# Supplementary material
Source: PubMed Central journal article supplement (PMC3306445)
Supplement: NIHMS359318-supplement-Supporting_Information.pdf [file NIHMS359318-supplement-Supporting_Information.pdf]

## Supplementary Table 1

## Data Collection and Refinement Statistics

|                               | <i>Pa</i> TMK<br><b>1</b>                             | <i>Pa</i> TMK<br><b>dFTM</b> | <i>Pa</i> TMK<br><b>17</b> |
|-------------------------------|-------------------------------------------------------|------------------------------|----------------------------|
| <i>Crystal Form</i>           |                                                       |                              |                            |
| Space Group                   | <i>P2</i> <sub>1</sub> <i>2</i> <sub>1</sub> <i>2</i> | <i>P2</i>                    | <i>P2</i> <sub>1</sub>     |
| Unit cell parameters          |                                                       |                              |                            |
| a (Å)                         | 74.3                                                  | 73.9                         | 46.2                       |
| b (Å)                         | 118.1                                                 | 41.5                         | 56.0                       |
| c (Å)                         | 42.0                                                  | 117.9                        | 82.1                       |
| $\alpha, \beta, \gamma$ (°)   | 90,90,90                                              | 90,90.02,90                  | 90,95.3,90                 |
| No. Molecules per asymm. unit | 2                                                     | 4                            | 2                          |
| <i>Data Collection</i>        |                                                       |                              |                            |
| Resolution (Å)                | 41.9-1.9                                              | 24.6-1.9                     | 32.1-1.7                   |
| No. of Unique Reflections     | 29,391                                                | 51,360                       | 43,285                     |
| No. of Observations           | 110,874                                               | 177,972                      | 155,047                    |
| R <sub>sym</sub> * (%)        | 6.9(44.3)                                             | 6.4(32.2)                    | 5.1(24.7)                  |
| $I/\sigma_I$                  | 18.7(2.6)                                             | 15.5(3.3)                    | 41.3(3.6)                  |

|                                                                                          |                    |                    |                    |
|------------------------------------------------------------------------------------------|--------------------|--------------------|--------------------|
| Data Completeness (%)                                                                    | 99.7(100)          | 97.5(90.9)         | 94.1(61.5)         |
| Mean Multiplicity                                                                        | 3.7(3.7)           | 3.5(3.0)           | 3.6(2.6)           |
| <i>Refinement</i>                                                                        |                    |                    |                    |
| No. of Reflections used in refinement                                                    | 27,872             | 48,710             | 43,283             |
| R <sub>cryst</sub> <sup>‡</sup> (%)                                                      | 19.5               | 17.5               | 19.2               |
| R <sub>free</sub> <sup>‡</sup> (%)                                                       | 24.2               | 23.6               | 21.2               |
| % Reflections used in R <sub>free</sub> ( F >0)                                          | 5.1                | 5.1                | 5.0                |
| R.m.s. deviations, bond lengths (Å)                                                      | 0.02               | 0.016              | 0.011              |
| R.m.s. deviations, bond angles (°)                                                       | 1.74               | 1.62               | 1.27               |
| Ramachandran plot (% most favored, % additional allowed residues, % disallowed residues) | 95.8<br>3.6<br>0.6 | 95.3<br>4.1<br>0.6 | 96.3<br>3.1<br>0.6 |
| Average B-factors (Å <sup>2</sup> )                                                      | 28.2               | 24.2               | 34.1               |

\* $R_{sym} = \frac{\sum_{hkl} \sum_i |I_i(hkl) - I(hkl)|}{\sum_{hkl} \sum_i I_i(hkl)}$  where  $I_i(hkl)$  is the intensity of an individual measurement, and  $I(hkl)$  is the mean intensity of this reflection. <sup>‡</sup>R factor =  $\frac{\sum_{hkl} |F_{obs}| - |F_{calc}|}{\sum_{hkl} |F_{obs}|}$ , where  $|F_{obs}|$  and  $|F_{calc}|$  are observed and calculated structure factor amplitudes, respectively. The values in parentheses for completeness,  $R_{sym}$  and  $1/\sigma$  correspond to the highest resolution shell.

The four reactions which comprise this assay system are illustrated below.

**COUPLED ASSAY:**

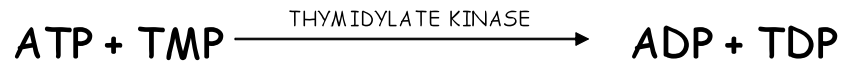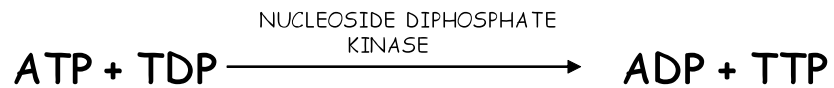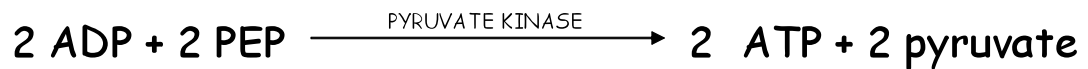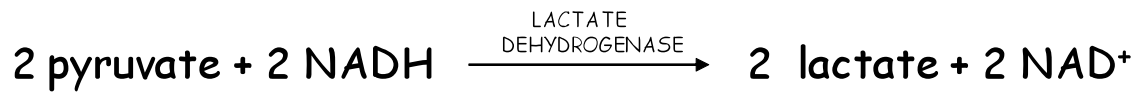

measure  $\text{OD}_{340 \text{ nm}}$
